# Supplementary material
Source: PubMed Central journal article supplement (PMC5002260)
Supplement: NIHMS807503-supplement-239_2016_9753_MOESM1_ESM.pdf [file NIHMS807503-supplement-239_2016_9753_MOESM1_ESM.pdf]

Online Resource 1. List of the 33 genes used for analysis.

| <b>Region</b>       | <b>Name</b> |
|---------------------|-------------|
| <b>Autosome</b>     | CG1239      |
|                     | CG3085      |
|                     | CG3509      |
|                     | CG5272      |
|                     | CG5499      |
|                     | CG5915      |
|                     | CG6036      |
|                     | CG6459      |
|                     | CG6971      |
|                     | CG6981      |
|                     | CG7387      |
|                     | CG7840      |
|                     | CG8277      |
|                     | CG9135      |
|                     | CG9383      |
|                     | CG10035     |
|                     | CG10252     |
|                     | CG10853     |
|                     | CG11981     |
|                     | CG12276     |
| CG13189             |             |
| CG18266             |             |
| CG18418             |             |
| <b>X Chromosome</b> | CG1749      |
|                     | CG2222      |
|                     | CG2577      |
|                     | CG3024      |
|                     | CG4593      |
|                     | CG9723      |
|                     | CG10920     |
|                     | CG11379     |
|                     | CG15336     |
| CG15717             |             |
