# Supplementary material
Source: PubMed Central journal article supplement (PMC5002260)
Supplement: NIHMS807503-supplement-239_2016_9753_MOESM3_ESM.pdf [file NIHMS807503-supplement-239_2016_9753_MOESM3_ESM.pdf]

A)

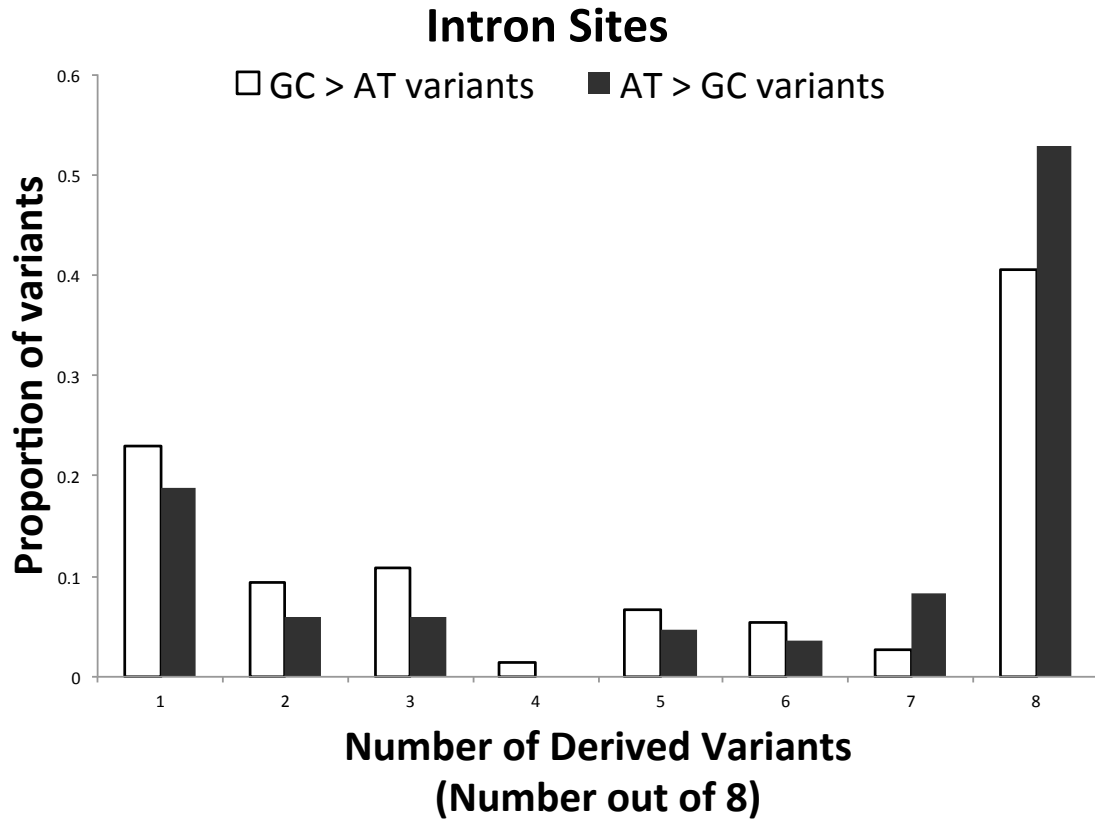

B)

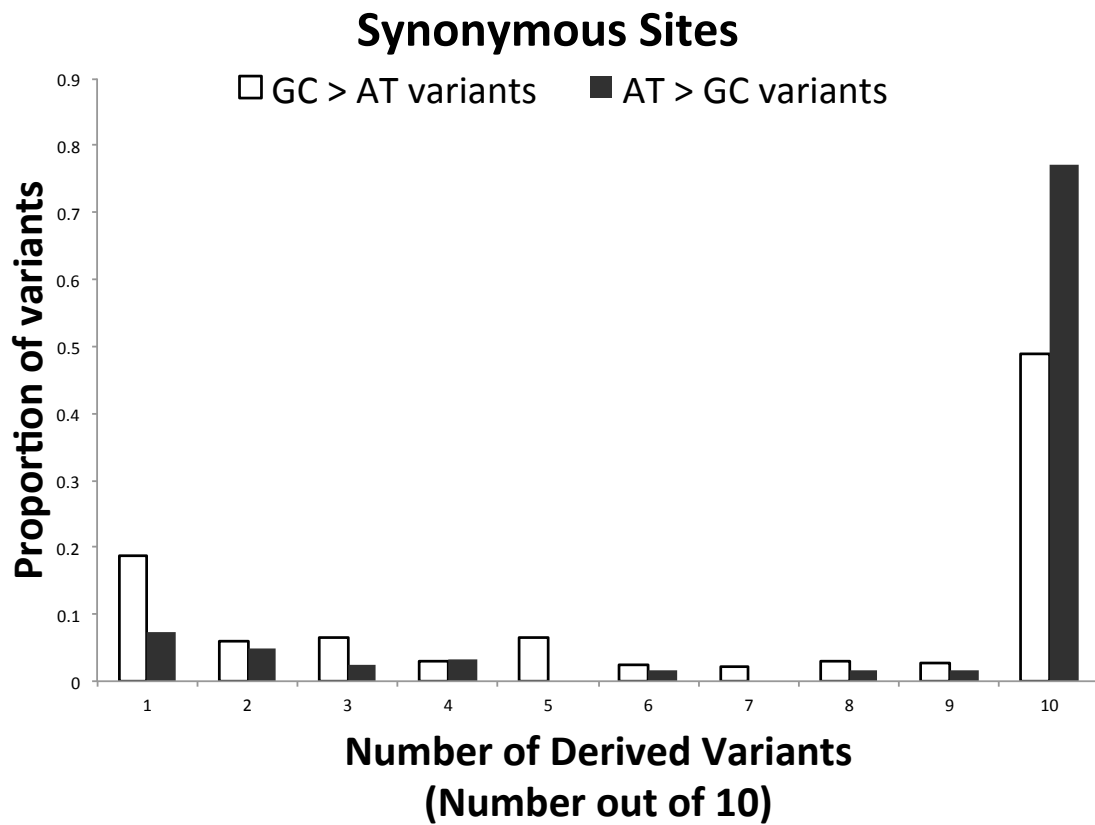

Online Resource 3. The proportion of segregating polymorphic and fixed GC and AT variants in introns and synonymous sites. Within and between species DNA variation are shown for A) Intron sites for 8 alleles where 1 equals to singletons and 8 equals to variants fixed specifically for *D. ananassae* and B) Synonymous sites for 10 alleles where 1 equals to singletons and 10 equals to variants fixed specifically for *D. ananassae*
