# Supplementary material
Source: PubMed Central journal article supplement (PMC5002260)
Supplement: NIHMS807503-supplement-239_2016_9753_MOESM4_ESM.pdf [file NIHMS807503-supplement-239_2016_9753_MOESM4_ESM.pdf]

Online Resource 4. Summary of the data used for fitting the population genetic model.

| <b>Data</b>       | <b>Location</b> | <b>G</b> | <b>n</b> | <b>L</b> | <b>S</b> |
|-------------------|-----------------|----------|----------|----------|----------|
| <b>Synonymous</b> | Autosome        | 23       | 10.7     | 6505     | 230      |
|                   | X Chromosome    | 10       | 10.45    | 2862     | 92       |
| <b>Intron</b>     | Autosome        | 16       | 9.94     | 3078     | 108      |
|                   | X Chromosome    | 16       | 10.02    | 4323     | 113      |

$G$  is the total number of genes used  $n$  is mean sample size  $L$  is total number of sites and  $S$  is the number of segregating sites.
